# Supplementary material for: Spatiotemporal optimization of NO x and VOC emissions using a hybrid inversion framework and its implication for ozone sensitivity diagnosis
Source: Copernicus journal article supplement (doi:10.5194/egusphere-2025-5837), 2026-01-14
Supplement: Supplementary file 1 [file egusphere-2025-5837-supplement.pdf]

*Supplement of*

# **Spatiotemporal optimization of NO<sub>x</sub> and VOC emissions using a hybrid inversion framework and its implication for ozone sensitivity diagnosis**

Jeonghyeok Moon<sup>1</sup>, Wonbae Jeon<sup>2,3</sup>, Sujong Jeong<sup>4,5,6</sup>, Yunsoo Choi<sup>7</sup>, Hyun Cheol Kim<sup>8,9</sup>, Soon-Young Park<sup>10</sup>, Juseon Bak<sup>11</sup>, Jung-Woo Yoo<sup>11</sup>, Jaehyeong Park<sup>12</sup>, Dongjin Kim<sup>2,12</sup>, Hyeonsik Choe<sup>2,12</sup>, Chae-Yeong Yang<sup>2,12</sup>, Min Heo<sup>2,12</sup>

<sup>1</sup>Environmental Planning Institute, Seoul National University, Seoul 08826, South Korea

<sup>2</sup>BK21 School of Earth and Environmental System, Pusan National University, Busan 46241, South Korea

<sup>3</sup>Department of Atmospheric Sciences, Pusan National University, Busan 46241, South Korea

<sup>4</sup>Department of Environmental Management, Graduate School of Environmental Studies, Seoul National University, Seoul, 08826, South Korea

<sup>5</sup>Climate Tech Center, Seoul National University, Seoul, 08826, South Korea

<sup>6</sup>Institute for Sustainable Development, Seoul National University, Seoul, 08826, South Korea

<sup>7</sup>Department of Earth and Atmospheric Sciences, University of Houston, Houston, TX 77204, USA

<sup>8</sup>Air Resources Laboratory, National Oceanic and Atmospheric Administration, College Park, MD, 20740, USA

<sup>9</sup>Cooperative Institute for Satellite Earth System Studies, University of Maryland, College Park, MD, 20742, USA

<sup>10</sup>Department of Science Education, Daegu National University of Education, Daegu, 42411, South Korea

<sup>11</sup>Institute of Environmental Studies, Pusan National University, Busan 46241, South Korea

<sup>12</sup>Division of Earth Environmental System, Pusan National University, Busan 46241, South Korea

*Correspondence to:* Wonbae Jeon (wbjeon@pusan.ac.kr)

**Table S1: Model configurations of the Weather Research and Forecasting (WRF) simulation.**

| WRF                                        | Domain 01(D1)                                       | Domain 02(D2)           |
|--------------------------------------------|-----------------------------------------------------|-------------------------|
| Horizontal Resolution<br>(Number of grids) | 27 km ( $150 \times 135$ )                          | 9 km ( $79 \times 79$ ) |
| Vertical layers                            | 35 Layers                                           |                         |
| Microphysics option                        | WSM 3-class simple ice scheme                       |                         |
| Radiation option                           | RRTM scheme(long-wave)<br>Dudhia scheme(short wave) |                         |
| Surface layer option                       | Revised MM5 Monin-Obukhov scheme (Jimenez)          |                         |
| Land-surface option                        | Unified Noah land-surface model                     |                         |
| PBL option                                 | YSU scheme                                          |                         |
| Cumulus option                             | Kain-Fritsch (new Eta) scheme                       |                         |
| Initial data                               | ERA5 ( $0.25^{\circ} \times 0.25^{\circ}$ )         |                         |
| Simulation period                          | 2022. 04. 26. 00 UTC – 2022. 05. 16. 00 UTC         |                         |

**Table S2: Model configurations of the Community Multi-scale Air Quality (CMAQ) simulation.**

| CMAQ                                       | Domain 01(D1)                               | Domain 02(D2)           |
|--------------------------------------------|---------------------------------------------|-------------------------|
| Horizontal Resolution<br>(Number of grids) | 27 km ( $137 \times 122$ )                  | 9 km ( $66 \times 66$ ) |
| Vertical layers                            | 15 Layers                                   |                         |
| Anthropogenic<br>emission                  | EDGAR_HTAPv3                                |                         |
| Biogenic emission                          | MEGANv2.1                                   |                         |
| Chemical mechanism                         | cb05cl_ae5_aq                               |                         |
| Simulation period                          | 2022. 04. 27. 00 UTC – 2022. 05. 15. 00 UTC |                         |

**Table S3: List of VOC species included in this study according to the carbon bond mechanism version 2005 (CB05).**

| <b>Model species</b> | <b>Definition</b>                     |
|----------------------|---------------------------------------|
| ALD2                 | Acetaldehyde                          |
| ALDX                 | Aldehydes with 3 or more carbons      |
| ETH                  | Ethene                                |
| ETHA                 | Ethane                                |
| FORM                 | Formaldehyde                          |
| IOLE                 | Internal alkene bond                  |
| ISOP                 | Isoprene                              |
| MEOH                 | Methanol                              |
| NVOL                 | Non-volatile compounds                |
| OLE                  | Terminal alkene bond                  |
| PAR                  | Carbon-carbon single bond             |
| TERP                 | Monoterpenes                          |
| TOL                  | Toluene and other monoalkyl aromatics |
| UNR                  | Unreactive                            |
| XYL                  | Xylene                                |

**Table S4. Statistical metrics used for evaluating model performance and inverse modeling results. Here,  $n$  is the total number of compared points,  $O_i$  is the observed value or ideal emission value, and  $M_i$  is the value of the CMAQ model value.**

| Descriptions            | Metrics   | Formula                                                                                                                                                                                    |
|-------------------------|-----------|--------------------------------------------------------------------------------------------------------------------------------------------------------------------------------------------|
| Mean observation        | $\bar{O}$ | $\frac{\sum_{i=1}^n O_i}{n}$                                                                                                                                                               |
| Mean model              | $\bar{M}$ | $\frac{\sum_{i=1}^n M_i}{n}$                                                                                                                                                               |
| Mean bias error         | MBE       | $\frac{\sum_{i=1}^n (M_i - O_i)}{n}$                                                                                                                                                       |
| Root mean square error  | RMSE      | $\sqrt{\frac{\sum_{i=1}^n (M_i - O_i)^2}{n}}$                                                                                                                                              |
| Index of agreement      | IOA       | $1 - \frac{\sum_{i=1}^n (M_i - O_i)^2}{\sum_{i=1}^n ( M_i - \bar{O}  +  O_i - \bar{O} )^2}$                                                                                                |
| Correlation coefficient | r         | $\sum_{i=1}^n \left( \left( \frac{O_i - \bar{O}}{\sqrt{\sum_{i=1}^n (O_i - \bar{O})^2}} \right) \times \left( \frac{M_i - \bar{M}}{\sqrt{\sum_{i=1}^n (M_i - \bar{M})^2}} \right) \right)$ |
| Normalized mean error   | NME       | $\frac{\sum_{i=1}^n  M_i - O_i }{\sum_{i=1}^n O_i} \times 100 \text{ [%]}$                                                                                                                 |

**Table S5. Statistical evaluation of 2 m temperature, 2 m relative humidity, and 10 m wind speed from the WRF simulation. Observational data were obtained from ASOS stations.**

|                                 | OBS   | WRF   | MBE   | RMSE  | IOA  | r    |
|---------------------------------|-------|-------|-------|-------|------|------|
| Temperature [°C]                | 16.03 | 14.88 | -1.16 | 2.35  | 0.94 | 0.91 |
| Wind speed [m s <sup>-1</sup> ] | 1.93  | 3.19  | 1.25  | 1.90  | 0.68 | 0.60 |
| Relative humidity [%]           | 59.74 | 62.89 | 3.16  | 12.95 | 0.90 | 0.82 |

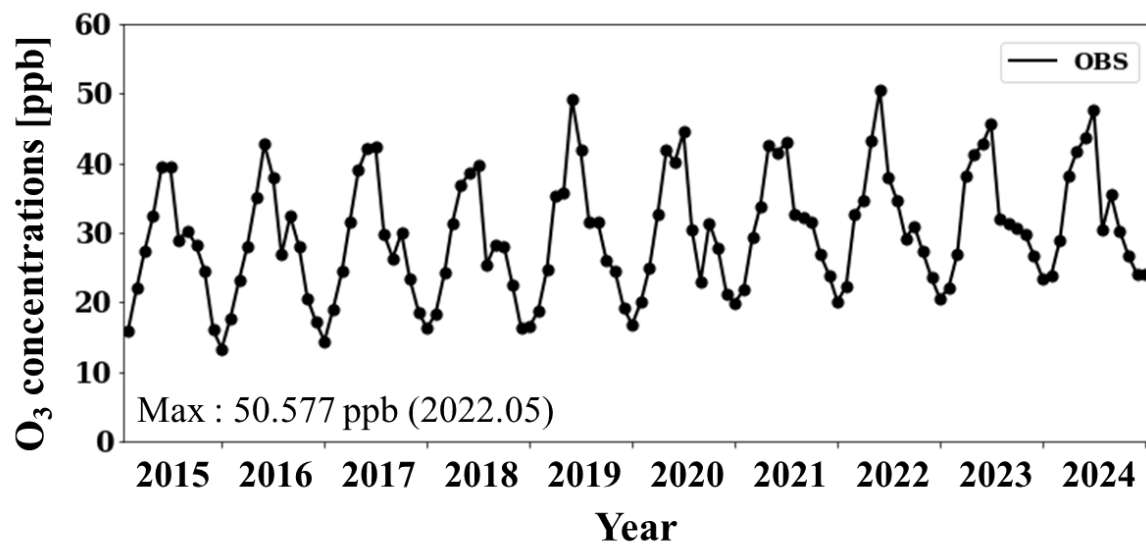

**Figure S1: Monthly averaged time series of observed O<sub>3</sub> concentrations over South Korea during the recent decade (2015–2024), based on the AQMS network.**

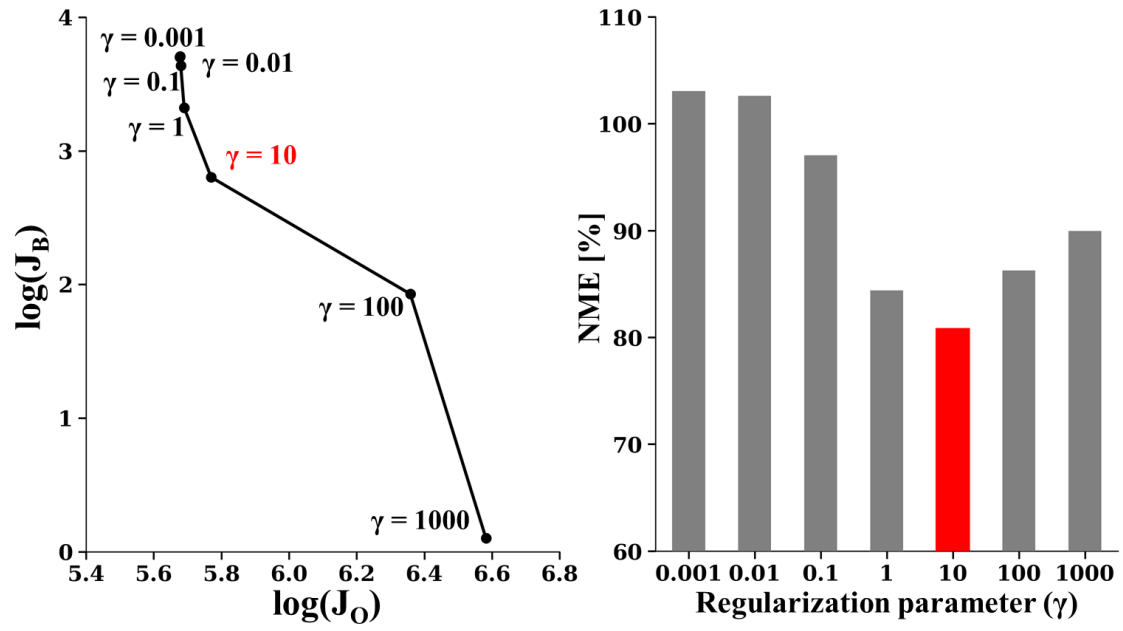

Figure S2: Results of the L-curve test and emission NME [%] used to determine the optimal regularization parameter ( $\gamma$ ) for the 4D-Var inverse modeling. The test was performed for  $\gamma$  values of 0.001, 0.01, 0.1, 1, 10, 100, and 1000, based on the simulation for 1 May 2022.



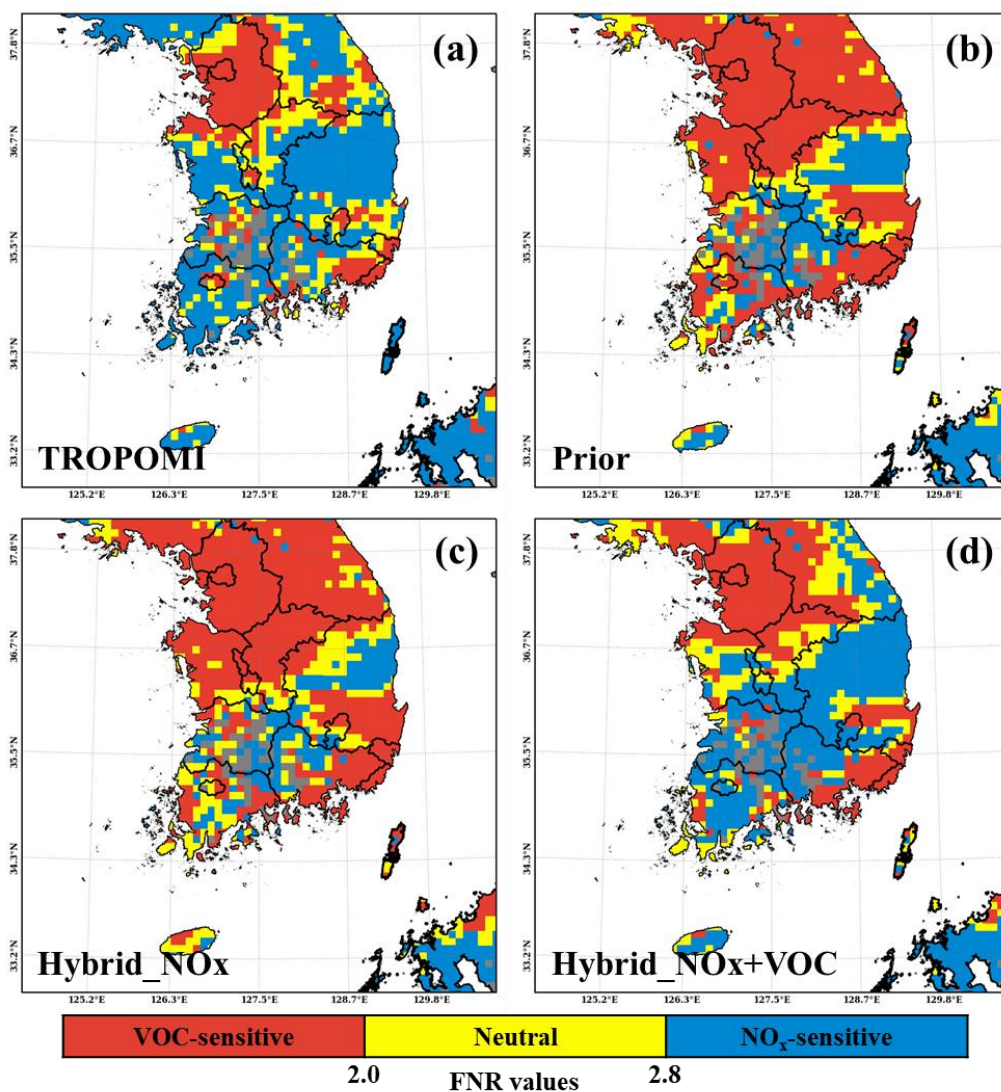

Figure S3: Spatial distributions of  $O_3$  sensitivity regimes for (a) TROPOMI-based FNR, (b) Prior, (c) Hybrid\_NOx, and (d) Hybrid\_NOx+VOC experiments, averaged over the study period. Red, yellow, and blue indicate VOC-sensitive, neutral, and NO<sub>x</sub>-sensitive regimes, respectively. Gray areas denote missing data.
